# Supplementary material
Source: publisher figshare collection journal article supplement (https://sage.figshare.com/ndownloader/files/17360402)
Supplement: Supplementary file 1 [file 17360402]

**Supplementary Table 1.** Items ordered by difficulty and item fit statistics

| Item number | Item difficulty  Logits | SE | Chi Square | Item Fit Residual | *p*-value |
| --- | --- | --- | --- | --- | --- |
| 1 | -1.661 | 0.084 | 5.947 | 1.293 | 0.203 |
| 2 | -1.116 | 0.082 | 4.111 | -2.283 | 0.391 |
| 3 | -0.754 | 0.122 | 11.828 | -1.699 | 0.019 |
| 4 | -0.739 | 0.083 | 7.724 | -1.371 | 0.102 |
| 5 | -0.536 | 0.110 | 4.242 | -0.984 | 0.374 |
| 6 | -0.465 | 0.083 | 2.927 | -1.319 | 0.570 |
| 7 | -0.416 | 0.085 | 2.658 | 0.903 | 0.617 |
| 8 | -0.253 | 0.086 | 2.102 | -0.507 | 0.717 |
| 9 | 0.200 | 0.093 | 2.477 | 1.368 | 0.649 |
| 10 | 0.284 | 0.127 | 3.022 | -1.323 | 0.554 |
| 11 | 0.311 | 0.133 | 7.850 | -1.919 | 0.097 |
| 12 | 0.412 | 0.138 | 2.908 | 0.130 | 0.573 |
| 13 | 0.419 | 0.127 | 4.352 | 0.336 | 0.360 |
| 14 | 0.603 | 0.128 | 6.313 | 1.778 | 0.177 |
| 15 | 0.680 | 0.132 | 2.080 | 0.156 | 0.721 |
| 16 | 0.842 | 0.136 | 2.327 | -0.958 | 0.676 |
| 17 | 0.988 | 0.138 | 1.869 | -0.718 | 0.760 |
| 18 | 1.200 | 0.144 | 3.190 | 0.897 | 0.526 |

***Legend:*** SE: Standard Error
